# Supplementary material for: A simple fluorescence assay for trypsin through a protamine-induced carbon quantum dot-quenching aggregation platform
Source: Royal Society of Chemistry journal article supplement (doi:10.1039/d0ra03970e), 2020-01-01
Supplement: d0ra03970e1.pdf [file d0ra03970e1.pdf]

## Simple fluorescence assay for trypsin through protamine-induced carbon quantum dots quenching aggregation platform

Yiping Chen<sup>a,#</sup>, Zuan Lin<sup>b,#</sup>, Chenfang Miao<sup>b</sup>, Qianqian Cai<sup>b</sup>, Fenglan Li<sup>b</sup>, Zongfu Zheng<sup>c\*</sup>, Xinhua Lin<sup>b</sup>, Yanjie Zheng<sup>b</sup>, Shaohuang Weng<sup>b,\*</sup>

a. Department of Interventional Radiology, The First Affiliated Hospital of Fujian Medical University, Fuzhou, 350005, China

b. Department of Pharmaceutical Analysis, School of Pharmacy, the Higher Educational Key Laboratory for Nano Biomedical Technology of Fujian Province, Fujian Medical University, Fuzhou 350122, China

c. The 900<sup>th</sup> Hospital of PLA, Fuzhou, 350002, China

Correspondence: shweng@fjmu.edu.cn (Shaohuang Weng), fuhos\_476@126.com (Zongfu Zheng)

# Yiping Chen and Zuan Lin contributed equally to this work.

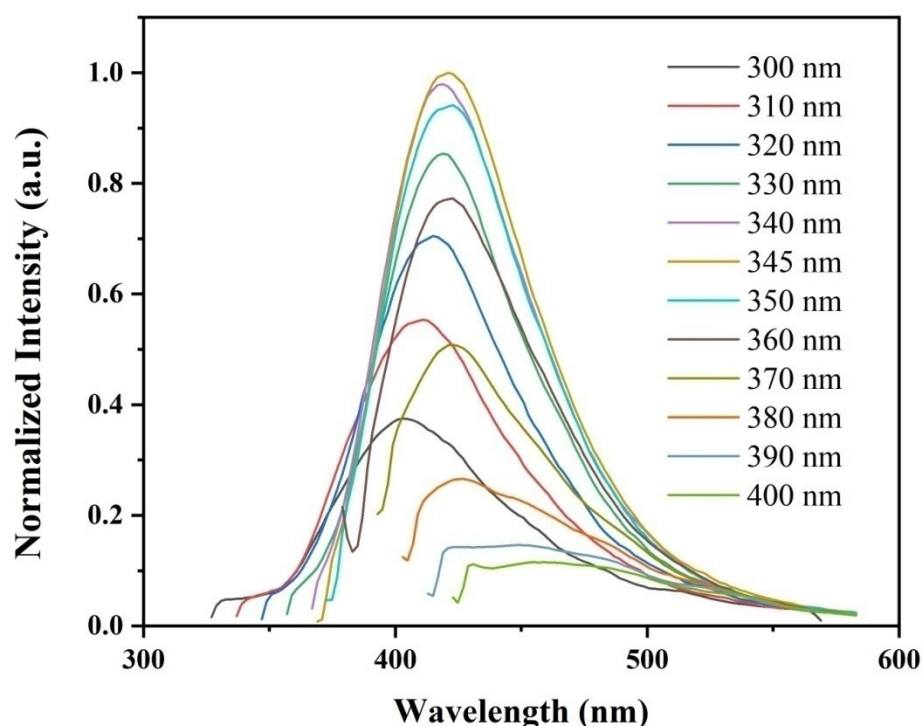

Fig. S1. Fluorescence spectra of CQDs under different exciting wavelengths

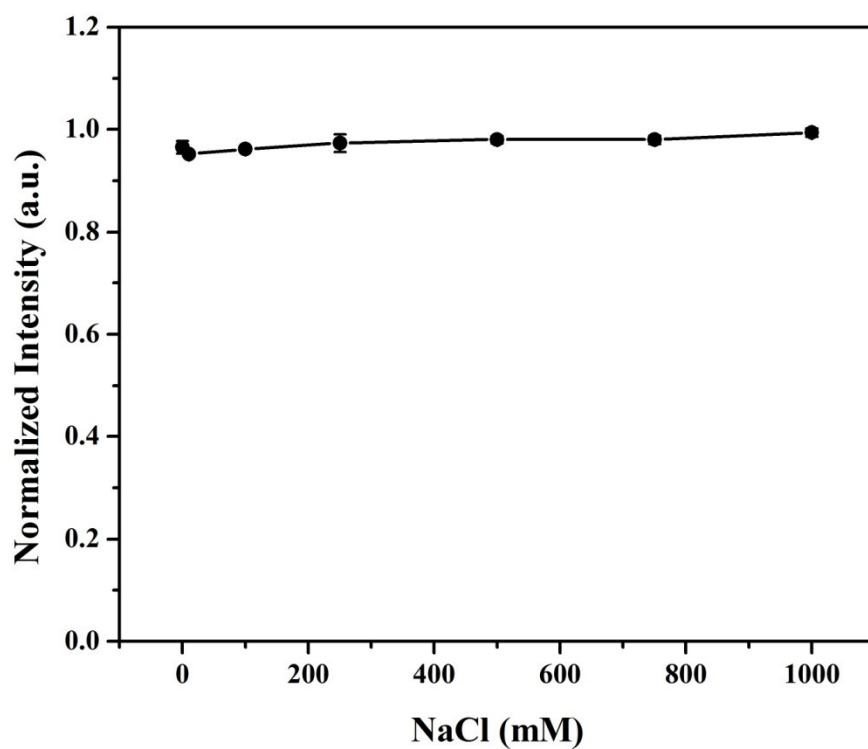

Fig. S2. Variable fluorescence intensities of CQDs in NaCl with different concentrations. Error bars represents the SD of three parallel determinations.

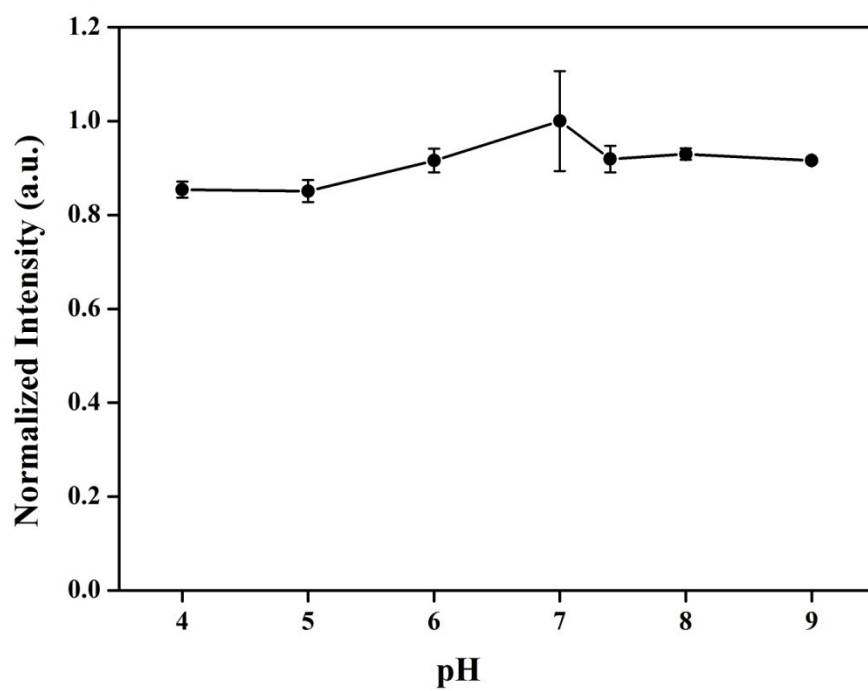

Fig. S3. Variable fluorescence intensities of CQDs in different pH conditions. Error bars represents the SD of three parallel determinations.

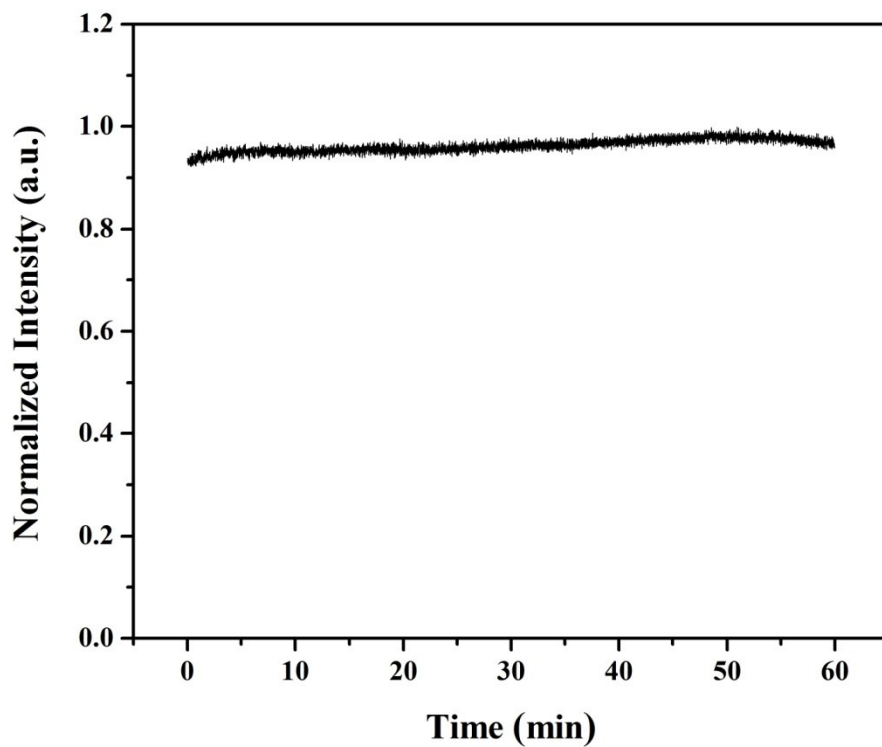

Fig. S4. Variable fluorescence intensities of CQDs under the excitation of 345 nm at continuous 1 hour

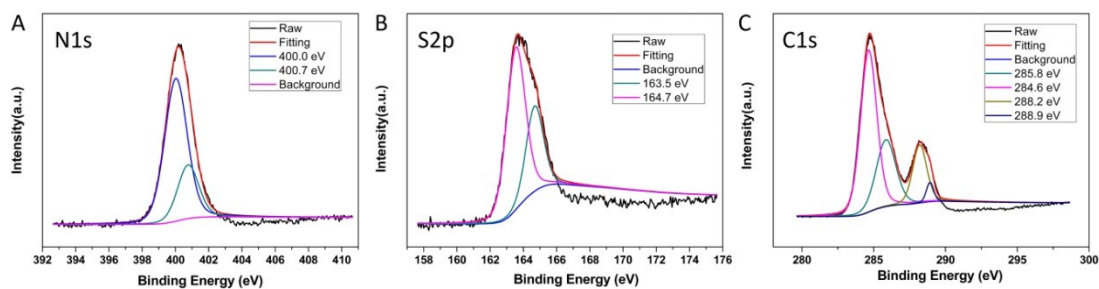

Fig. S5. High-resolution XPS spectra of N1s (A), S2p (B), and C1s (C).

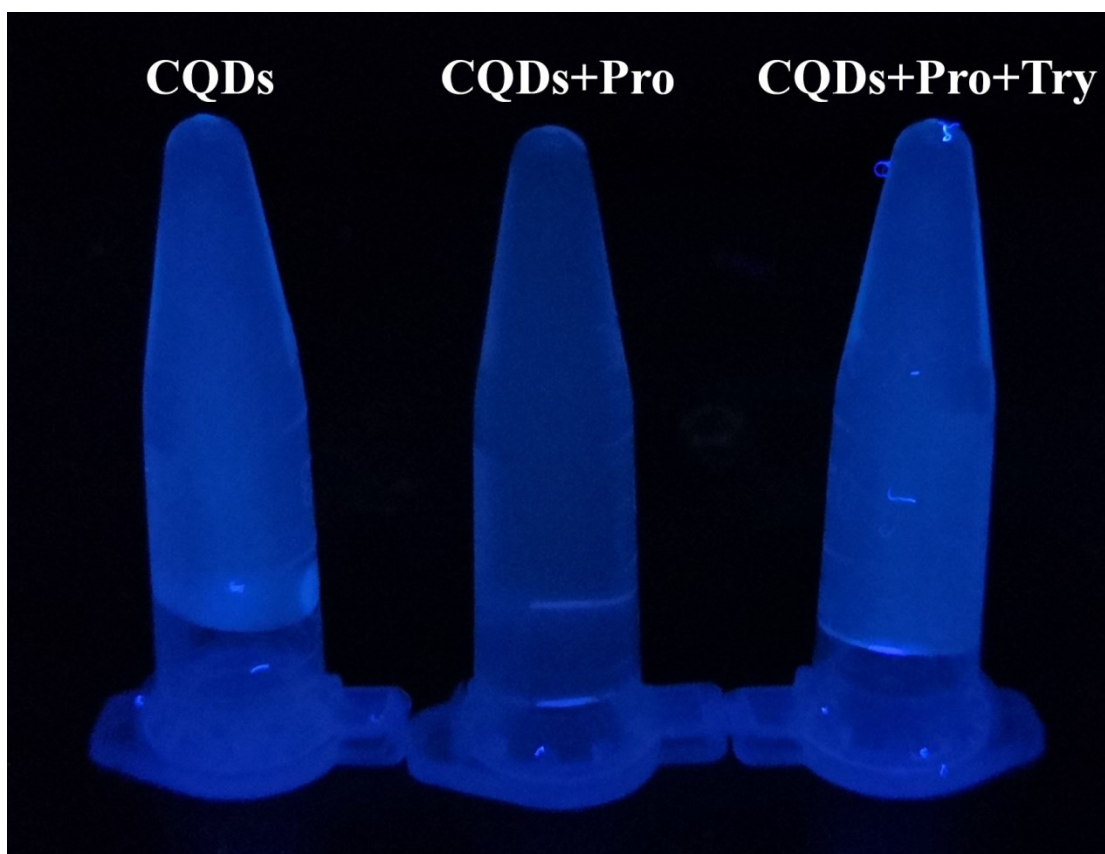

Fig. S6. Fluorescence image of CQDs, CQDs/Pro and the addition of Try into CQDs/Pro under a 365 nm UV lamp.

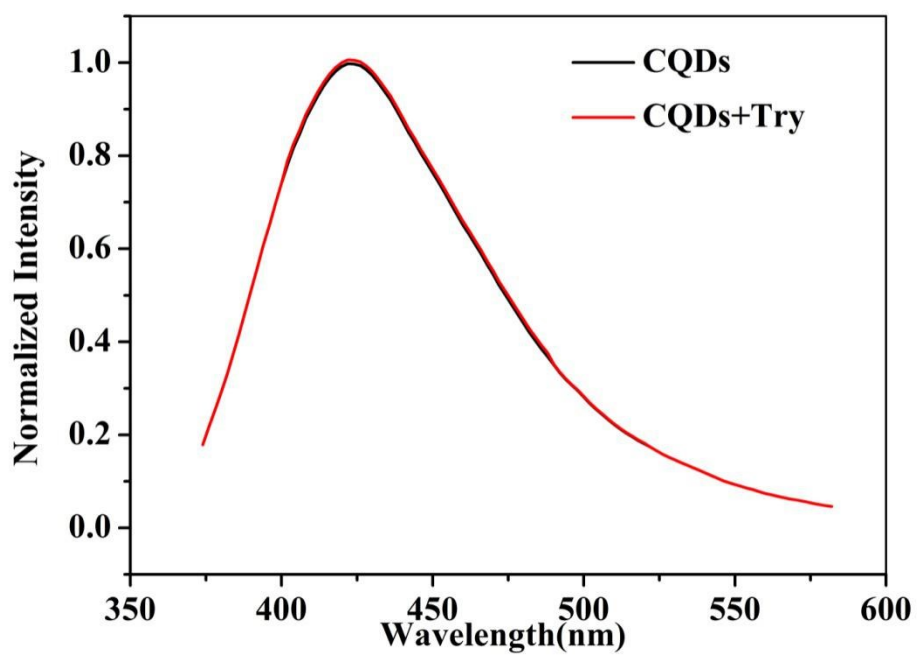

Fig. S7. Fluorescence spectra of CQDs without and with the presence of Try.

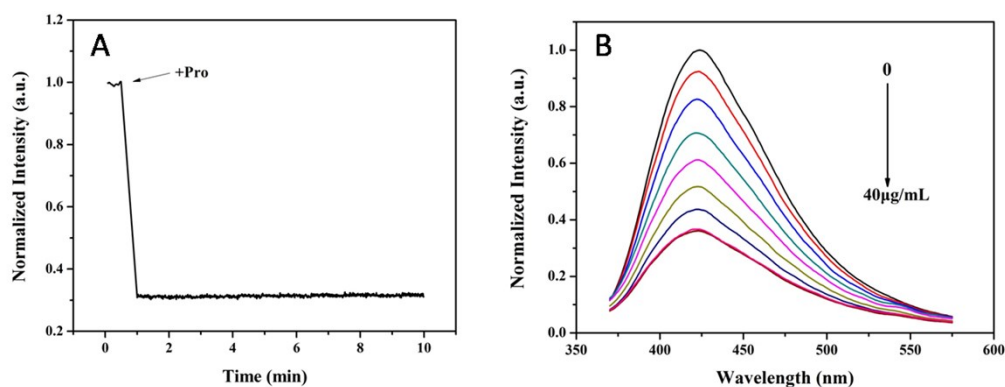

Fig. S8. The variable fluorescence intensities (A) or fluorescence spectra (B) of CQDs with the addition of 40  $\mu\text{g/mL}$  Pro in different period (A) and different contents (B).

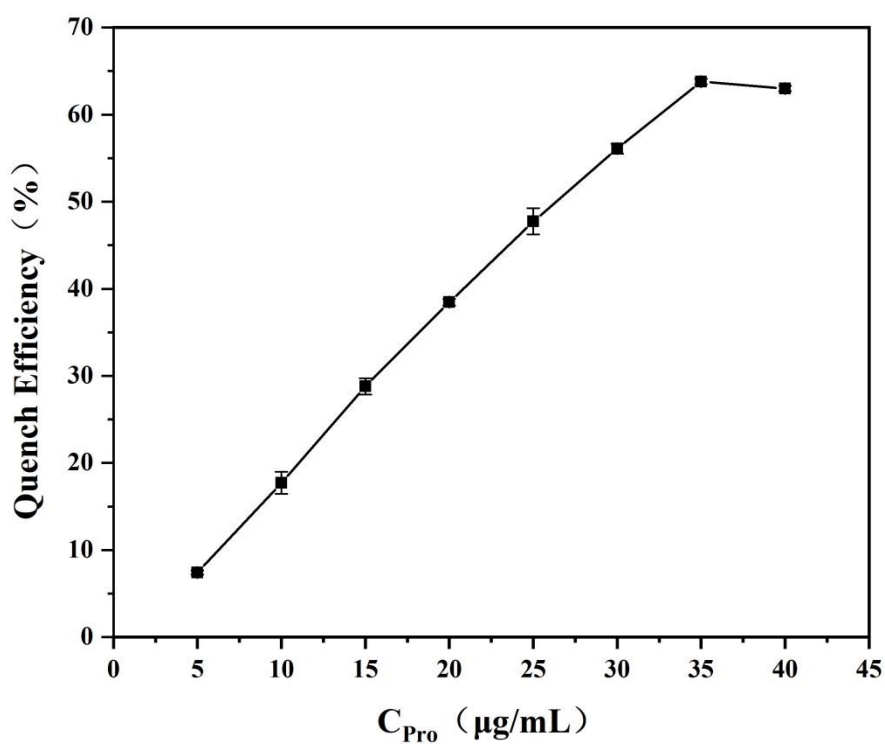

Fig. S9. Curve of fluorescence quenching efficiency with different Pro concentration to 20  $\mu\text{g/mL}$  CQDs. Error bars represents the SD of three parallel determinations.

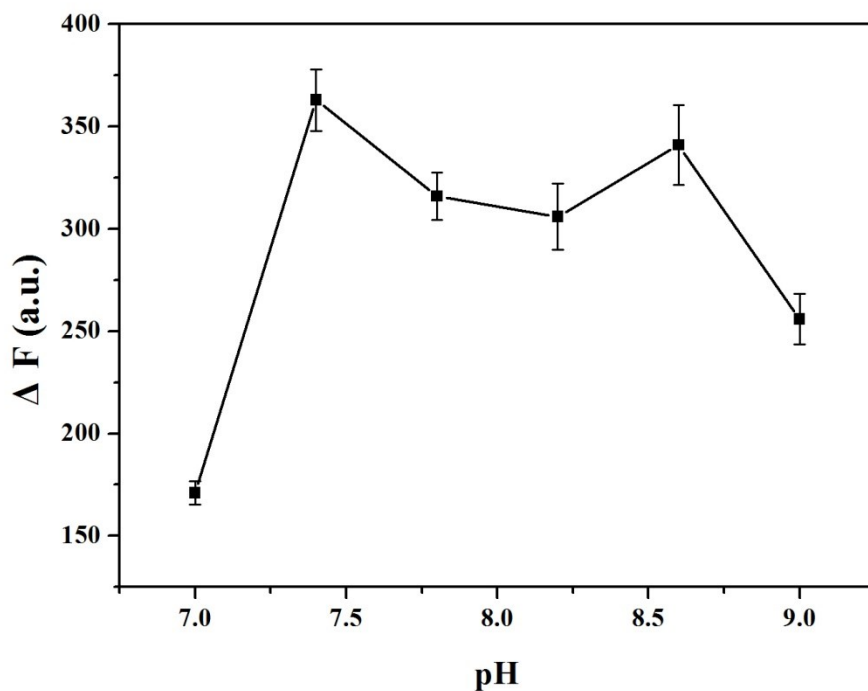

Fig. S10. The fluorescence recovery ( $\Delta F=F-F_0$ ) of CQDs/Pro towards 500 ng/mL Try at different pH. Error bars represents the SD of three parallel determinations.

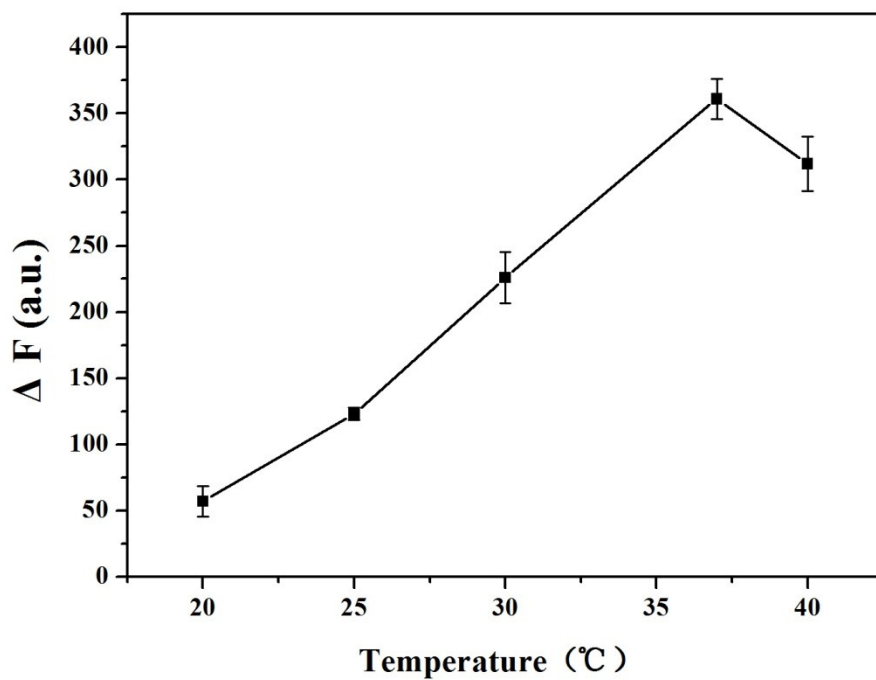

Fig. S11. The fluorescence recovery ( $\Delta F=F-F_0$ ) of CQDs/Pro towards 500 ng/mL Try at different temperatures. Error bars represents the SD of three parallel determinations.

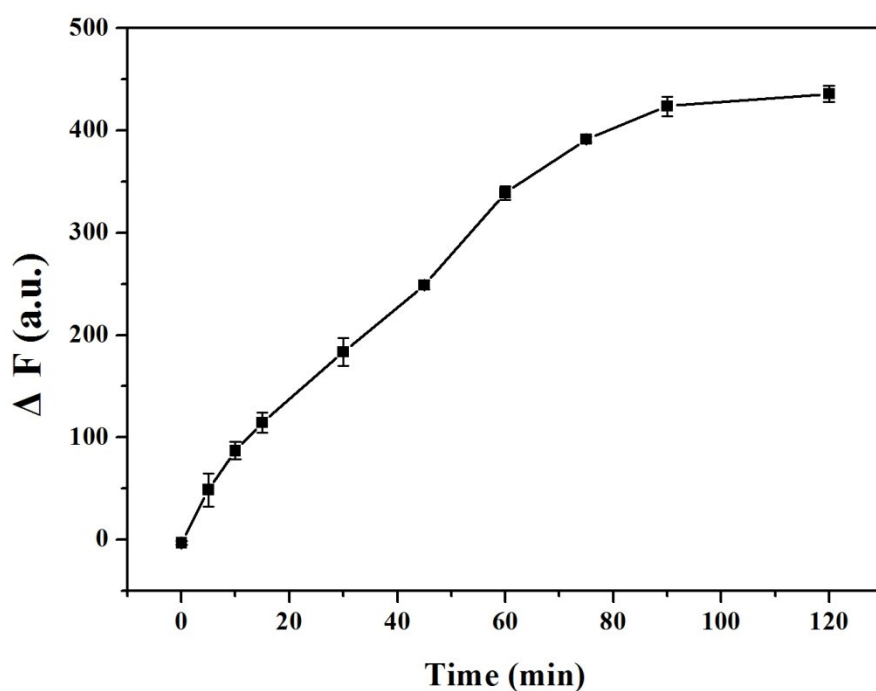

Fig. S12. The fluorescence recovery ( $\Delta F = F - F_0$ ) of CQDs/Pro towards 500 ng/mL Try at different reacting time. Error bars represents the SD of three parallel determinations.

Table S1: Comparison of different methods for determination of Try

| Detection method or Material                     | LOD<br>(ng/mL) | Linear range<br>(ng/mL) | reference |
|--------------------------------------------------|----------------|-------------------------|-----------|
| Mn-doped ZnSe quantum dots                       | 40             | 100-12000               | [S1]      |
| Surface imprinting strategies                    | 100            | Not mentioned           | [S2]      |
| Gold nanoclusters                                | 9              | 10-50000                | [S3]      |
| Redox cycling in the presence of L-ascorbic acid | 100            | 100-1000                | [S4]      |
| Self-Powered Sensor for Naked-Eye                | 500            | Not mentioned           | [S5]      |
| Silver nanoparticles                             | 2              | 2.5-200                 | [S6]      |
| DNA hosted Cu nanoclusters                       | 0.0048         | 0.1-1000                | [S7]      |
| BSA-stabilized gold nanoclusters                 | 2              | 10-10000                | [S8]      |
| Silver triangular nanoplates                     | 1.8            | 5-80                    | [S9]      |
| CQDs/pro                                         | 8.08           | 25-500                  | this work |

Table S2: Detection of spiked Try in serum samples

| Samples | Added<br>(ng/mL) | Found<br>(ng/mL) | Recovery<br>(%) | RSD<br>(n=3, %) |
|---------|------------------|------------------|-----------------|-----------------|
| 1       | 25.00            | 27.25            | 109.04          | 2.90            |
| 2       | 50.00            | 50.01            | 100.02          | 2.39            |
| 3       | 250.00           | 247.68           | 99.07           | 1.55            |
| 4       | 500.00           | 517.39           | 103.47          | 1.42            |

### Reference

- [S1] X. Gao, G. Tang, Y. Li and X. Su, *Anal Chim Acta*, 2012, 743, 131-136.
- [S2] O. Hayden, C. Haderspock, S. Krassnig, X. Chen and F. L. Dickert, *Analyst*, 2006, 131, 1044-1050.
- [S3] X. You, Y. Li, B. Li and J. Ma, *Talanta*, 2016, 147, 63-68.
- [S4] S. Park and H. Yang, *Analyst*, 2014, 139, 4051-4055.
- [S5] B. A. Zaccaro and R. M. Crooks, *Analytical Chemistry*, 2011, 83, 1185-1188.
- [S6] P. Miao, T. Liu, X. Li, L. Ning, J. Yin and K. Han, *Biosens Bioelectron*, 2013, 49, 20-24.
- [S7] L. Wang, F. Shi, Y. Li and X. Su, *Sensors and Actuators B: Chemical*, 2016, 222, 945-951.
- [S8] L. Hu, S. Han, S. Parveen, Y. Yuan, L. Zhang and G. Xu, *Biosensors and Bioelectronics*, 2012, 32, 297-299.
- [S9] H. Chen, A. Fang, Y. Zhang and S. Yao, *Talanta*, 2017, 174, 148-155.
